# Supplementary material for: Deciphering the Pharmacological Properties of Methanol Extract of Psychotria calocarpa Leaves by In Vivo, In Vitro and In Silico Approaches
Source: MDPI journal article supplement (doi:10.3390/ph13080183), 2020-08-06
Supplement: s1 [file s1]

# Deciphering the pharmacological properties of methanol extract of *Psychotria calocarpa* leaves by in vivo, in vitro and in silico approaches

Tahmina Akter Bristy <sup>1,†</sup>, Niloy Barua <sup>1,†</sup>, Abu Montakim Tareq <sup>1,†</sup>, Shahenur Alam Sakib <sup>2</sup>, Saida Tasnim Etu <sup>1</sup>, Kamrul Hasan Chowdhury <sup>1</sup>, Mifta Ahmed Jyoti <sup>1</sup>, Md. Arfin Ibn Aziz <sup>1</sup>, A.S.M. Ali Reza <sup>1</sup>, Elisabetta Caiazzo <sup>3</sup>, Barbara Romano <sup>3</sup>, Syed Mohammed Tareq <sup>1,\*</sup>, Talha Bin Emran <sup>4,\*</sup> and Raffaele Capasso <sup>5,\*</sup>

- <sup>1</sup> Department of Pharmacy, International Islamic University Chittagong, Kumira, Chittagong 4318, Bangladesh; tahminabristy4@gmail.com (T.A.B.); niloybaruaniloy@gmail.com (N.B.); montakim0.abu@gmail.com (A.M.T.); saidatasnim96@gmail.com (S.T.E.); kamrulhasan73132@gmail.com (K.H.C.); mifta\_ahmed@yahoo.com (M.A.J.); arfinibnaziz151085@gmail.com (M.A.I.A.); alirezaru@gmail.com (A.S.M.A.R.)
- <sup>2</sup> Department of Theoretical and Computational Chemistry, University of Dhaka, Dhaka 1000, Bangladesh; sakibhasaniiuc@gmail.com
- <sup>3</sup> Department of Pharmacy, School of Medicine, University of Naples Federico II via Domenico Montesano, Naples 49 80131, Italy; elisabetta.caiazzo@unina.it (E.C.); barbara.romano@unina.it (B.R.)
- <sup>4</sup> Department of Pharmacy, BGC Trust University Bangladesh, Chittagong 4381, Bangladesh
- <sup>5</sup> Department of Agricultural Sciences, University of Naples Federico II, Portici 80055, Italy
- <sup>†</sup> These authors contributed equally to this work
- <sup>\*</sup> Correspondence: mail2babor@gmail.com (S.M.T.); talhabmb@bgctub.ac.bd (T.B.E.); rafcapas@unina.it (R.C.); Tel.: +88-01711-170994 (S.M.T.); +88-01819-942214 (T.B.E.); +39-081-678664 (R.C.)

**Table S1:** Semi-qualitative phytochemical screening of *P. calocarpa* leaves.

| Test Name    | Results |
|--------------|---------|
| Alkaloid     | +       |
| Glycosides   | +       |
| Tannins      | +       |
| Saponins     | +       |
| Resins       | +       |
| Carbohydrate | –       |
| Flavonoid    | +       |
| Phenols      | +       |
| Terpenoids   | –       |
| Quinones     | –       |
| Proteins     | –       |

### 1. Semi-qualitative Phytochemical Screening

The semi-qualitative phytochemical analysis of the methanol extract of *P. calocarpa* leaves was carried out by the standard methodology for testing the alkaloid, glycosides, tannins, saponins, resins, carbohydrate, flavonoid, phenols, terpenoids, quinones, and proteins [1-3].

#### 1.1. Test for Alkaloids

Two milliliters of extract solution were added with the 2-3 drops of Mayer's reagent, whereas the white precipitates considered as the presence of alkaloids.

#### 1.2. Test for Glycosides

The Borntrager's methodology was followed, whereas 2 mL of extract solution were added with 3 mL of chloroform and shaken well. After shaking, the layer of chloroform was separated and added ammonia solution (10%), whereas the pink color indicates the presence of glycosides.

#### 1.3. Test for Tannins

Five milliliters of extract solution were added with the few drops of ferric chloride solution (5%), whereas the dark green color considered as the presence of tannins.

#### 1.4. Test for Saponins

Three milliliters of extract solution was added with the 10 mL of distilled water (D.W.) in a test tube. The solution was shaken vigorously for five minutes and then allowed to stand still for thirty minutes to form frothing. This frothing indicates the presence of saponins.

#### 1.5. Test for Resins

One milliliter of extract solution were added with the few mL of  $C_4H_6O_3$  and 1 mL of conc.  $H_2SO_4$  in a test tube, whereas the conversation of orange to yellow color indicated the presence of resins.

#### 1.6. Test for carbohydrate

The Benedict's methodology was followed, whereas 0.5 mL of extract solution was added with 0.5 mL of Benedict's solution and heated in water bath for 2 min. The red precipitates indicate the presence of carbohydrates.

#### 1.7. Test for Flavonoid

One milliliter of extract solution was added with the few mL of lead acetate (10%) in a test tube, whereas the yellow precipitates indicated the presence of flavonoids.

#### *1.8. Test for Phenols*

Five milliliter of extract solution was added with the 3 mL of lead acetate (10%) in a test tube and mixed very gently, whereas the white precipitates indicated the presence of phenols.

#### *1.9. Test for Terpenoids*

Three milliliter of extract solution was added with the 1 mL of chloroform and 2 mL of conc.  $\text{H}_2\text{SO}_4$  in a test tube, whereas the reddish brown color indicated the presence of terpenoids.

#### *1.10. Test for Quinones*

One milliliter of extract solution was added with the few mL of alcoholic Potassium hydroxide (KOH) in a test tube, whereas the colour change from red to blue indicated the presence of quinones.

#### *1.11. Test for Proteins*

Two milliliter of extract solution was added with the two mL of water and few drops of conc.  $\text{HNO}_3$  in a test tube, whereas the yellow color indicated the presence of proteins.

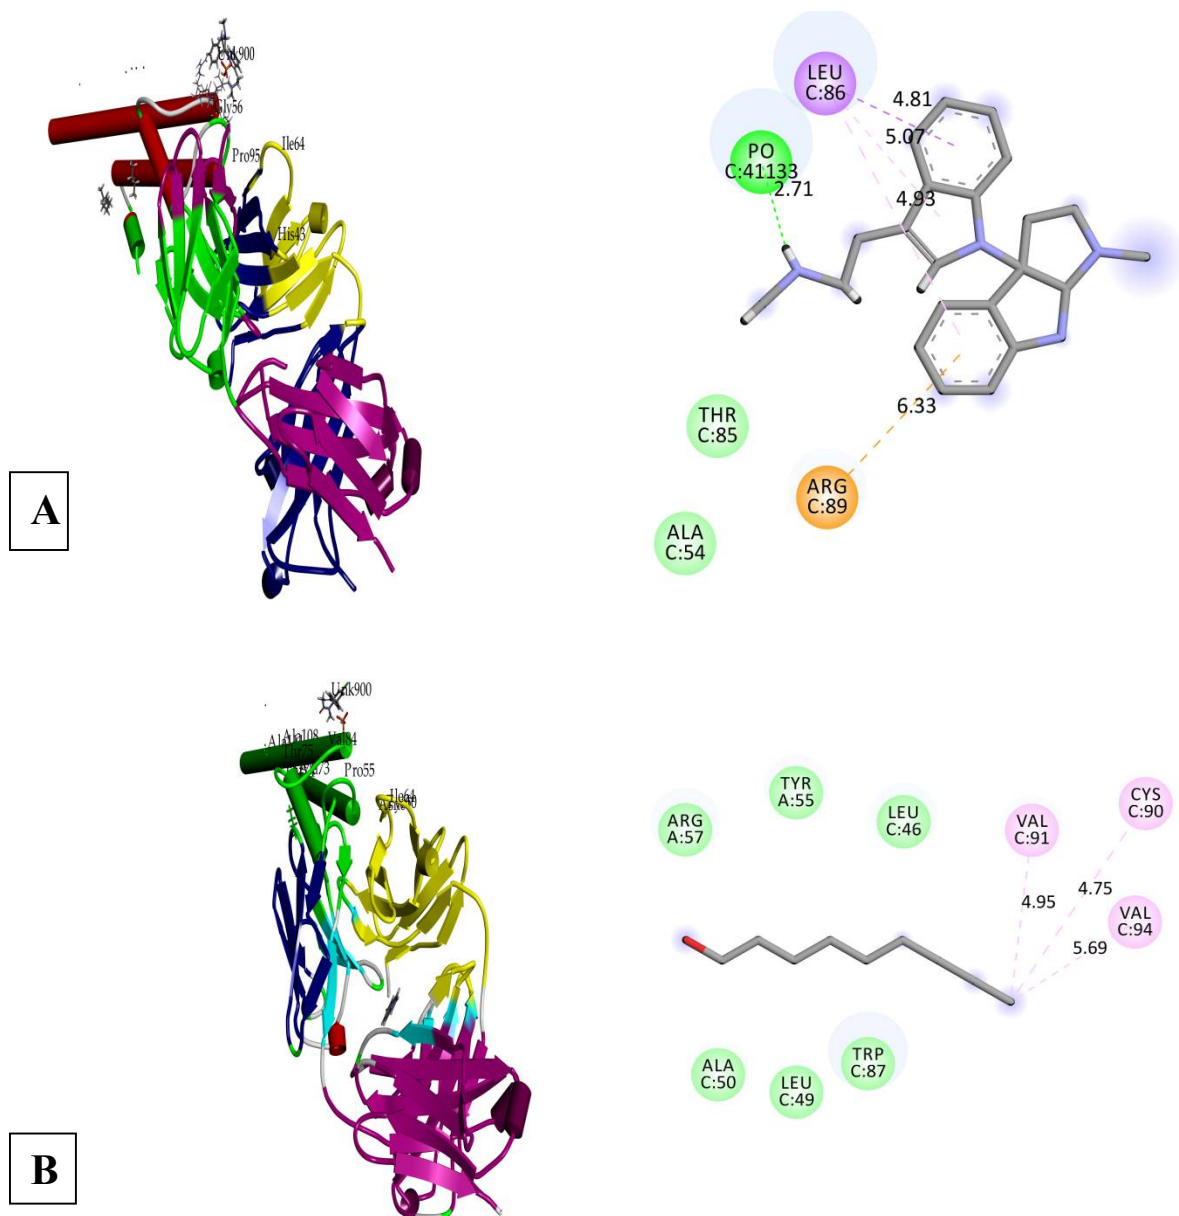

**Figure S1:** 3D and 2D interactions of psychotriasine (A) and diazepam (B) with the potassium channel receptor (PDB: 4UUJ) for anxiolytic activity.

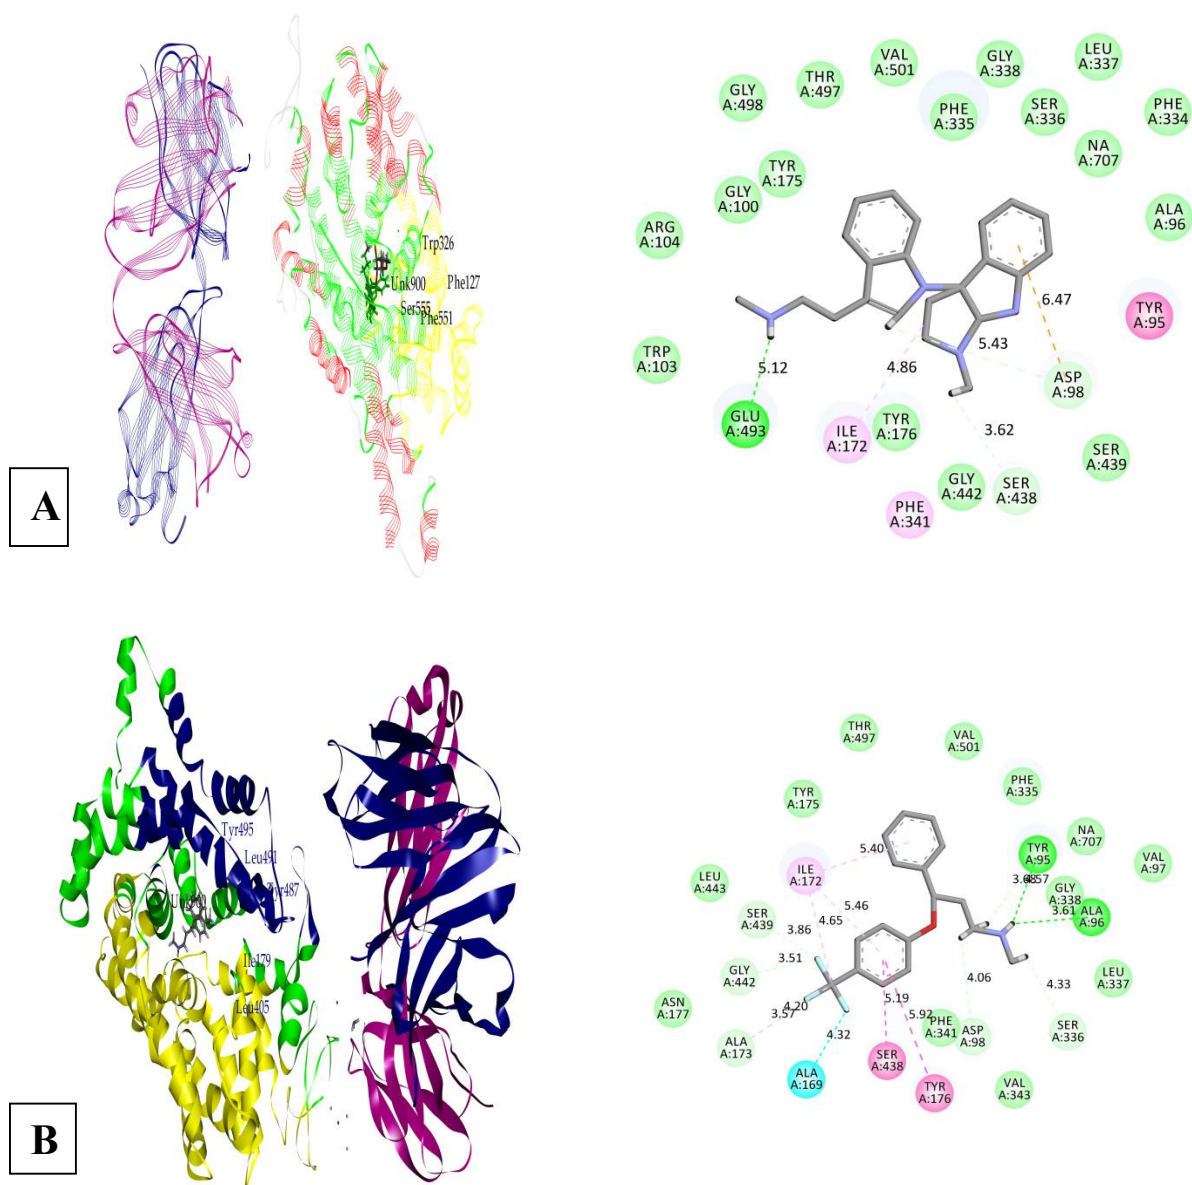

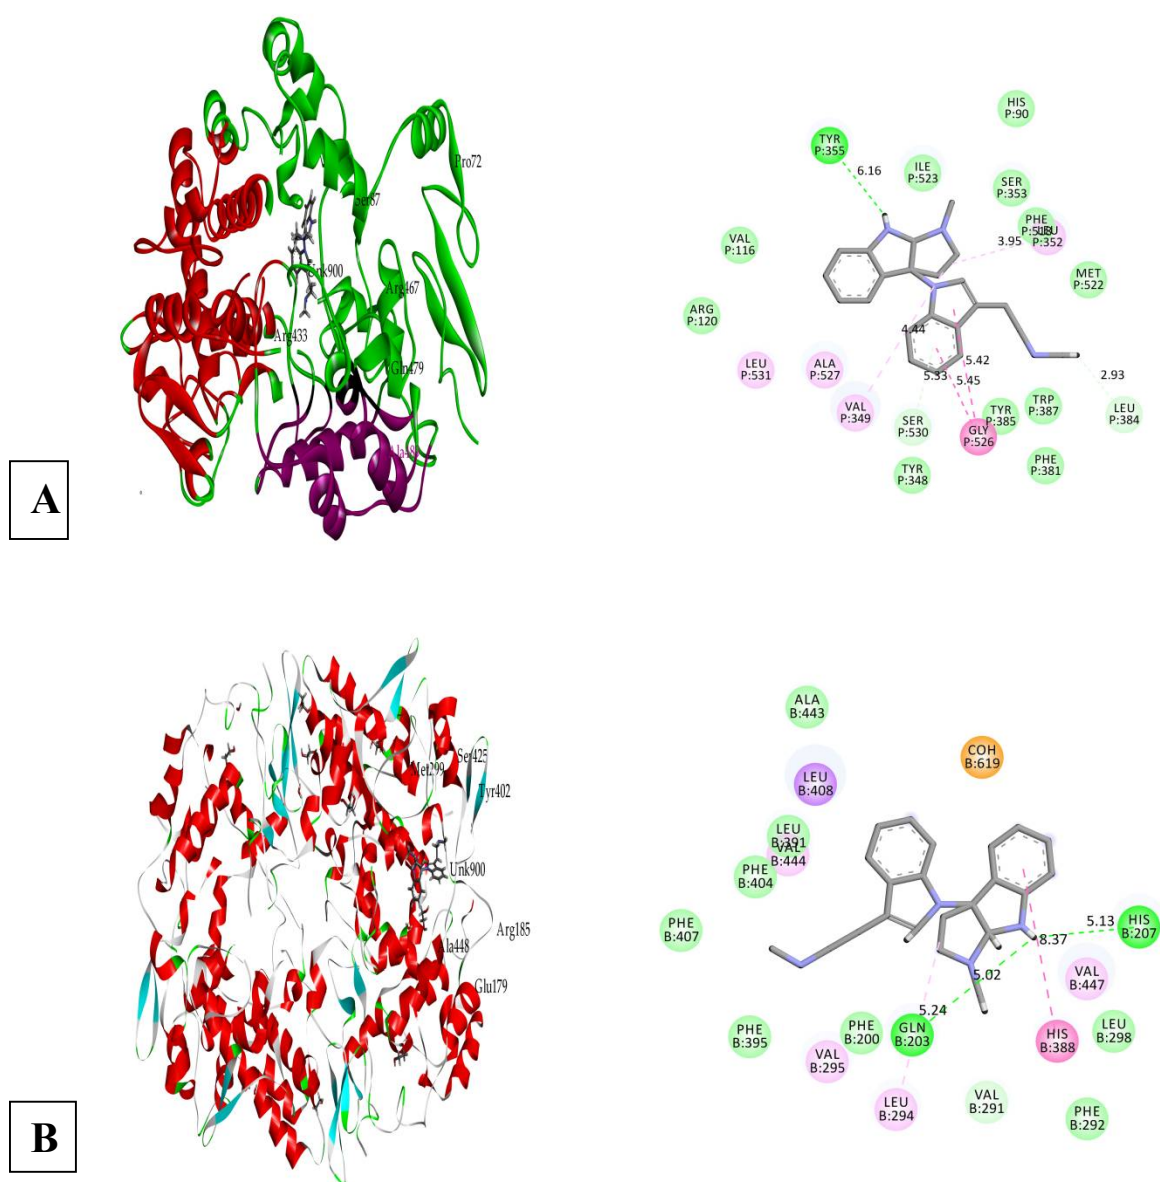

**Figure S3:** 3D and 2D interactions of psychotriasine with COX-1 (PDB: 2OYE, A) and COX-2 (PDB: 3HS5, B) enzyme for anti-nociceptive activity.

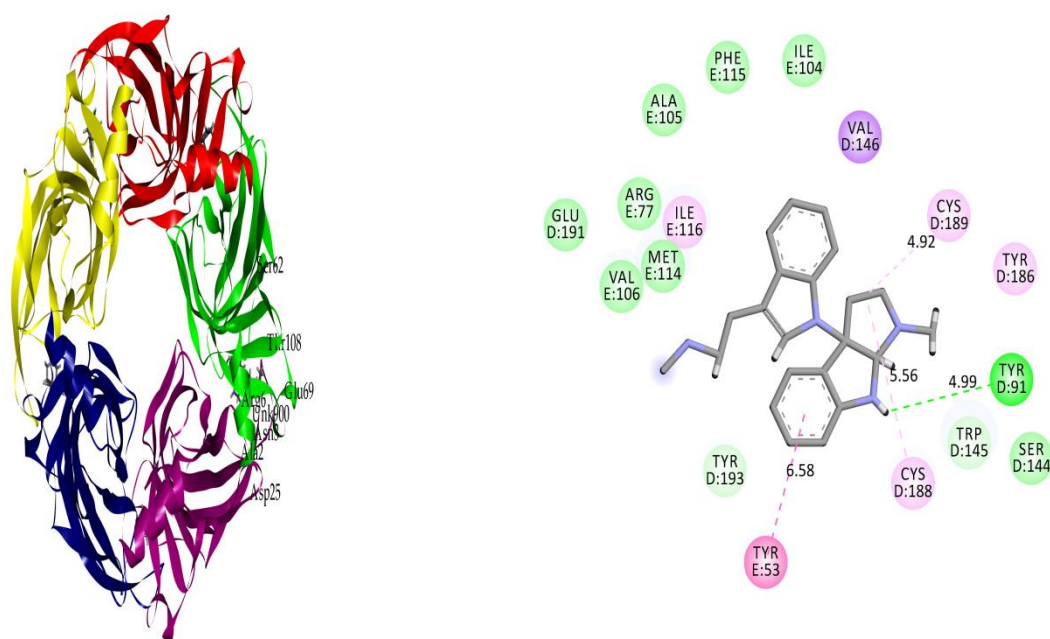

**Figure S4:** 3D and 2D interactions of psychotriasine with 5-HT3 receptor (PDB: 5AIN) for antidiarrheal activity.

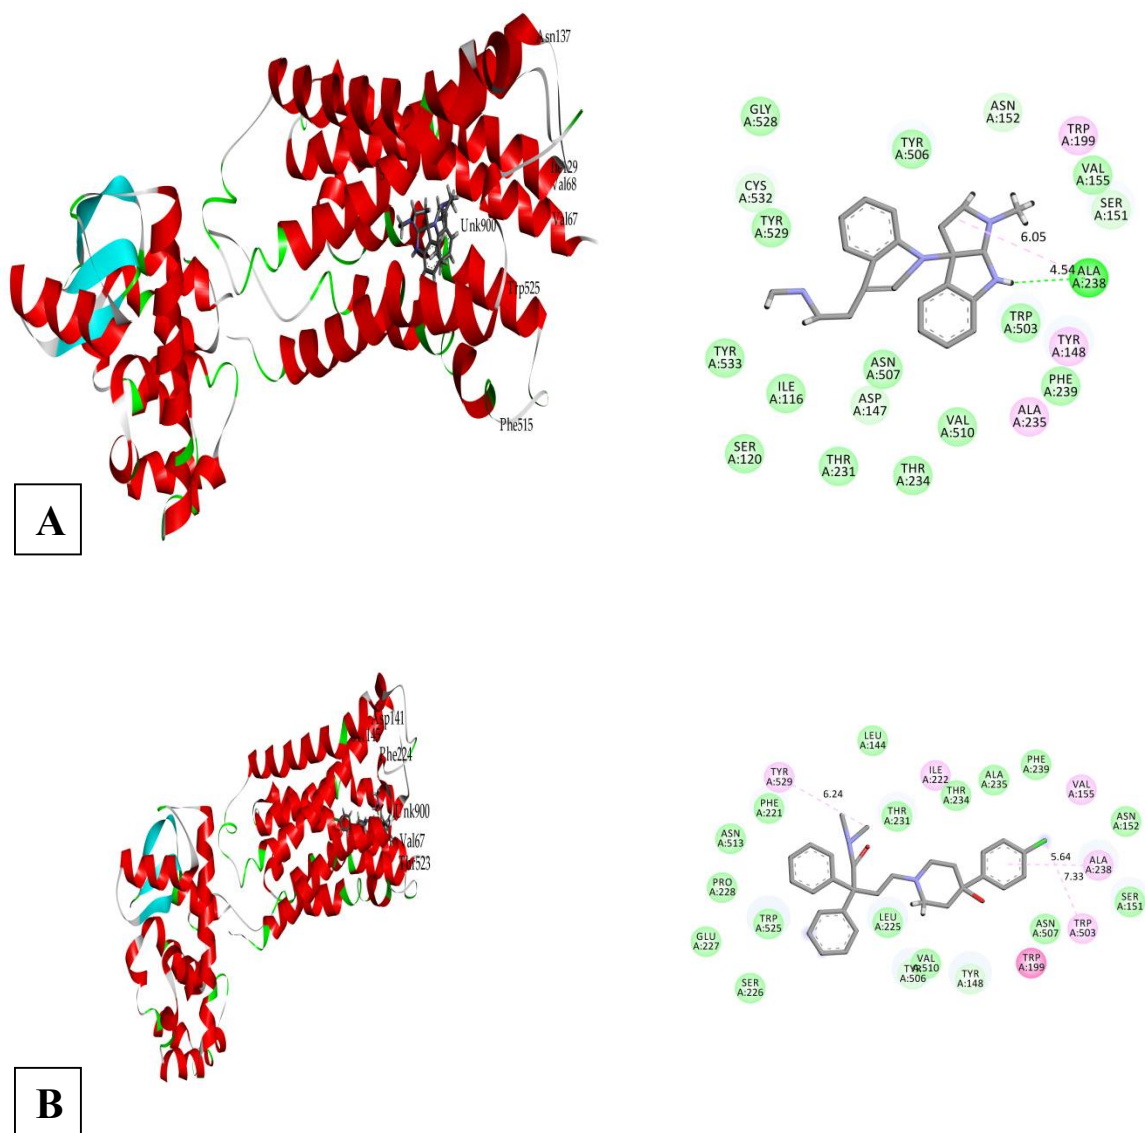

**Figure S5:** 3D and 2D interactions of psychotriasine (A) and loperamide (B) with M3 muscarinic acetylcholine receptor (PDB: 4U14) for anti-diarrheal activity.



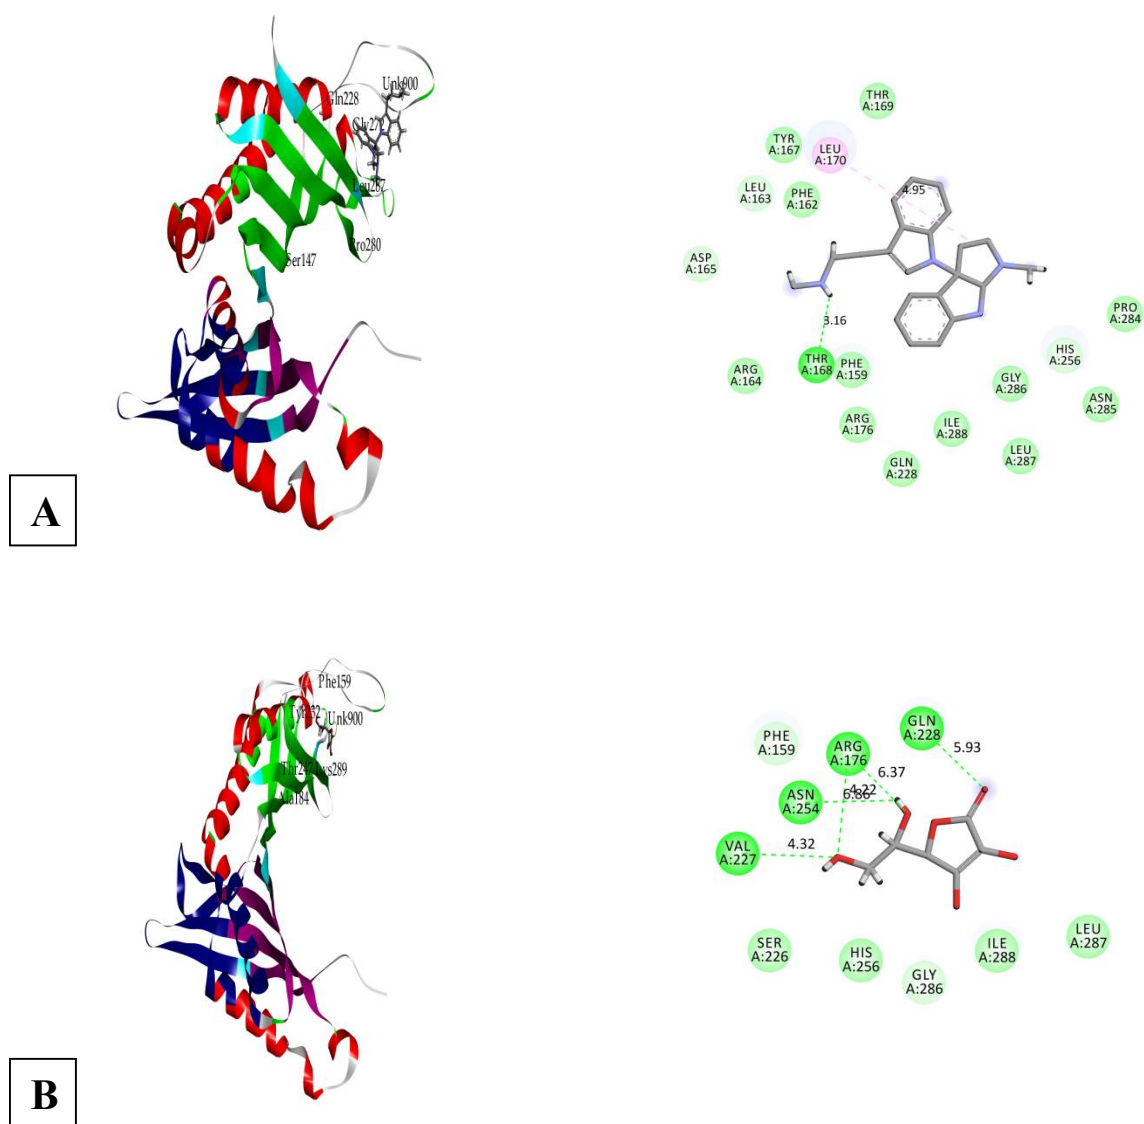

**Figure S6:** 3D and 2D interactions of psychotriasine (A) and Ascorbic acid (B) with the urate oxidase (PDB: 1R4U) for antioxidant activity.

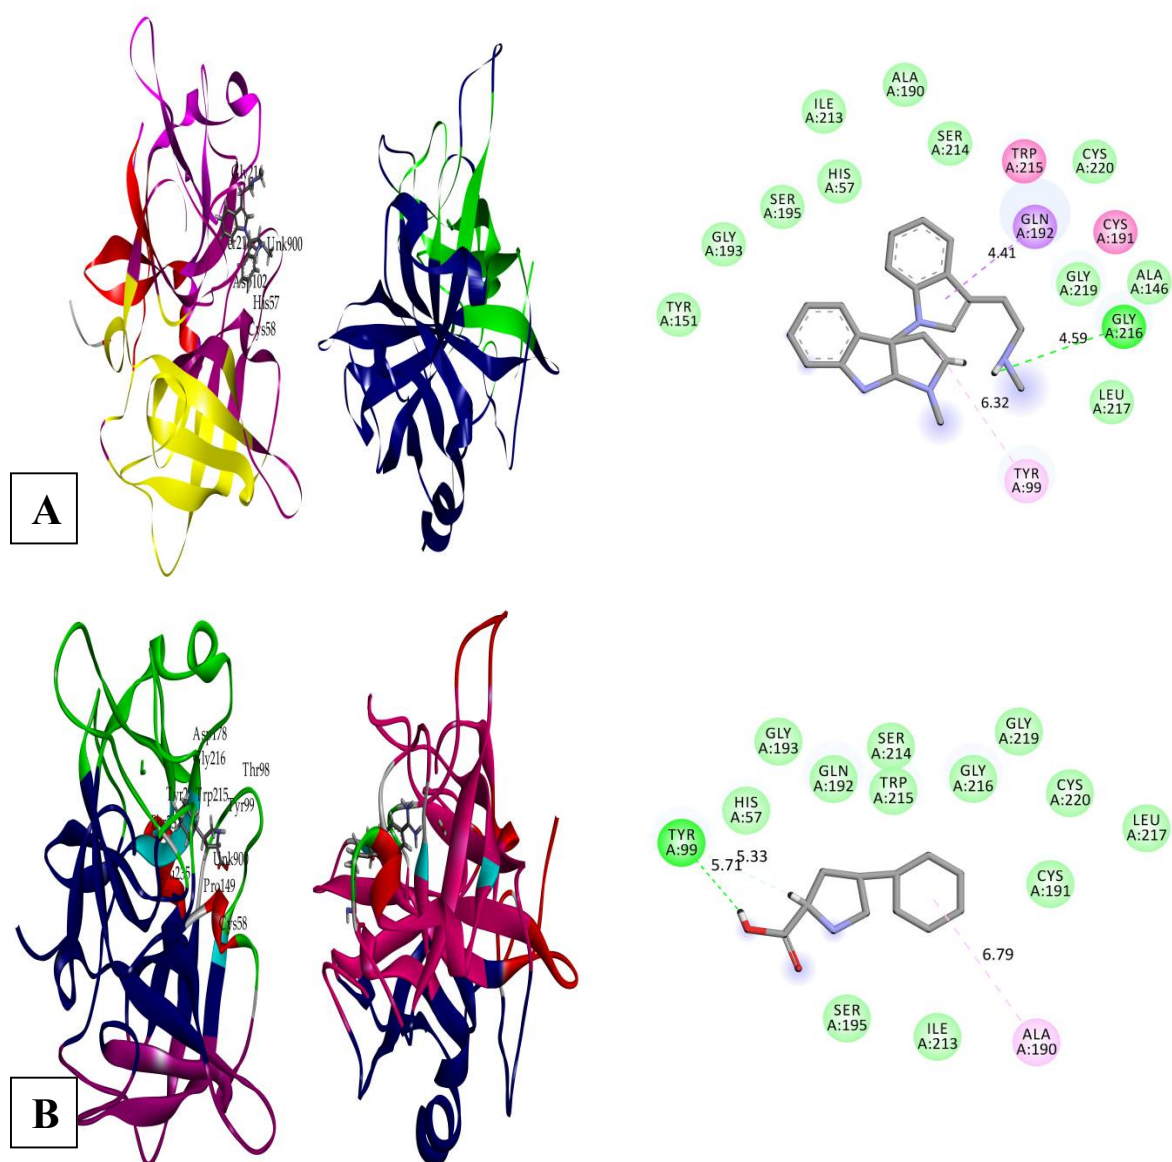

**Figure S7:** 3D and 2D interactions of psychotriasine (A) and streptokinase (B) with the human tissue plasminogen activator (PDB: 1A5H) for thrombolytic activity.

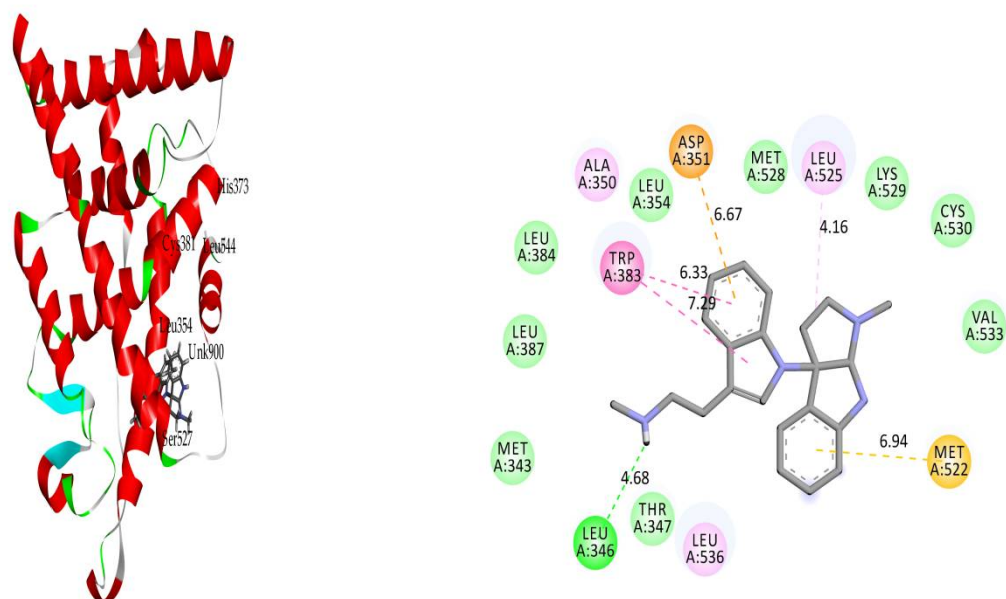

**Figure S8:** 3D and 2D interactions of psychotriasine with the human estrogen receptor (PDB: 3ERT) for cytotoxic activity.

## References

1. Auwal, M. S.; Saka, S.; Mairiga, I. A.; Sanda, K. A.; Shuaibu, A.; Ibrahim, A., Preliminary phytochemical and elemental analysis of aqueous and fractionated pod extracts of *Acacia nilotica* (Thorn mimosa). *Vet Res Forum* **2014**, 5, (2), 95-100.
2. Evans, W. C., *Trease and evans' pharmacognosy E-book*. Elsevier Health Sciences: 2009.
3. Hossain, M. S.; Reza, A.; Rahaman, M. M.; Nasrin, M. S.; Rahat, M. R. U.; Islam, M. R.; Uddin, M. J.; Rahman, M. A., Evaluation of morning glory (*Jacquemontia tamnifolia* (L.) Griseb) leaves for antioxidant, antinociceptive, anticoagulant and cytotoxic activities. *J Basic Clin Physiol Pharmacol* **2018**, 29, (3), 291-299.
